# Supplementary material for: Knowledge, Attitudes, and Perceived Barriers toward Genetic Testing and Pharmacogenomics among Healthcare Workers in the United Arab Emirates: A Cross-Sectional Study
Source: PubMed Central journal article supplement (PMC7711841; doi:10.3390/jpm10040216), 2020-11-09
Supplement: jpm-10-00216-s001.pdf [file jpm-10-00216-s001.pdf]

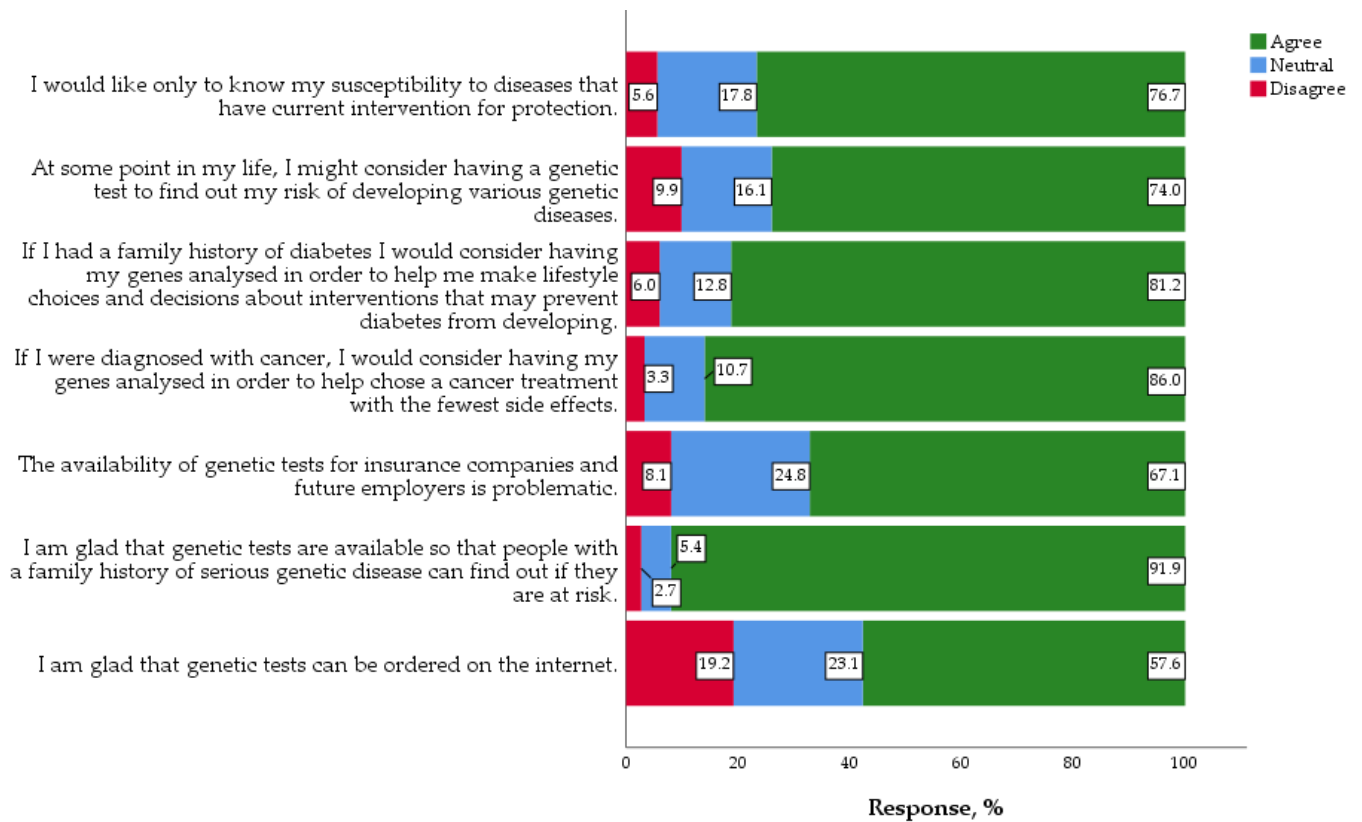

Figure S1 (a): Attitudes on genetic testing (N = 388)

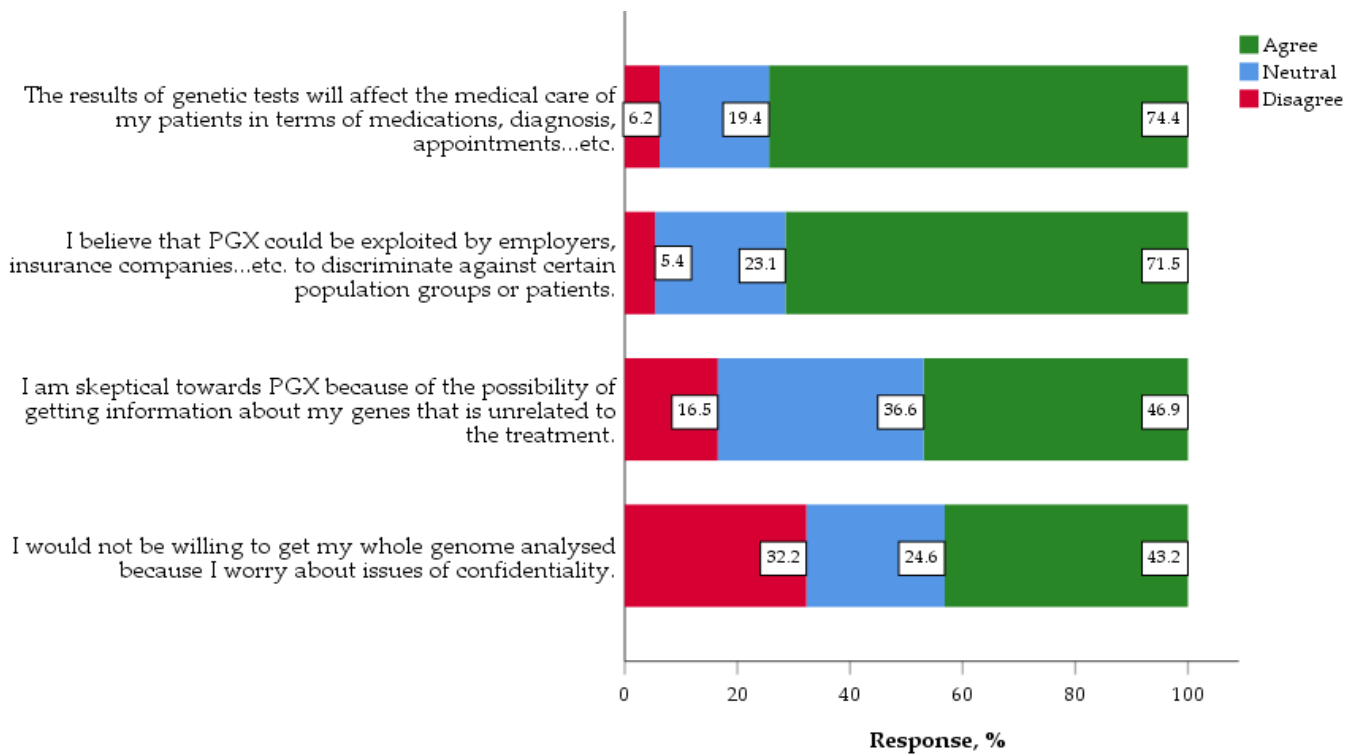

Figure S1 (b): Concerns and ethics on PGX and genetic testing (N = 388)
